# Supplementary material for: Proteomic Analysis of Estrogen-Mediated Enhancement of Mesenchymal Stem Cell-Induced Angiogenesis In Vivo
Source: MDPI journal article supplement (doi:10.3390/cells10092181), 2021-08-24
Supplement: s1 [file s1]

Supplementary materials

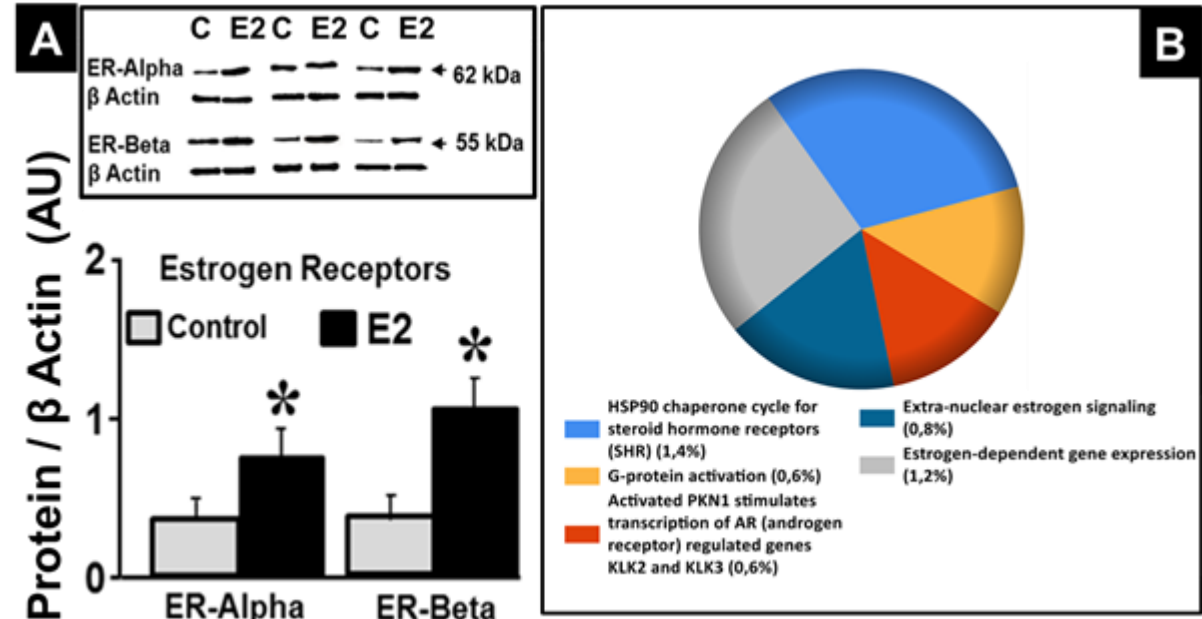

**Figure S1** MSCs express estrogen receptors and estradiol modulates hormone associated cellular mechanisms. (A) Western Blots depicting the presence of estrogen receptors (ER) alpha and ER Beta in WJ-MSCs in presence and absence of E2 and as previously described by us (Mihai et al., J Mol Cell Cardiol 2019, 133, 115-124, doi: 10.1016/j.yjmcc.2019.06.007). (B) Depicts different percentages (%) of hormone associated cellular mechanisms in E2 treated MSCs. FunRich (Uniprot database) analysis of the proteins differentially expressed by E2 stimulation showed a significant over-representation (False discovery rate corrected p-value < 0.05) of proteins participating in different cellular components and identified by Reactome pathways to reveal the different percentages (%) of hormone associated cellular mechanisms in E2 treated MSCs.

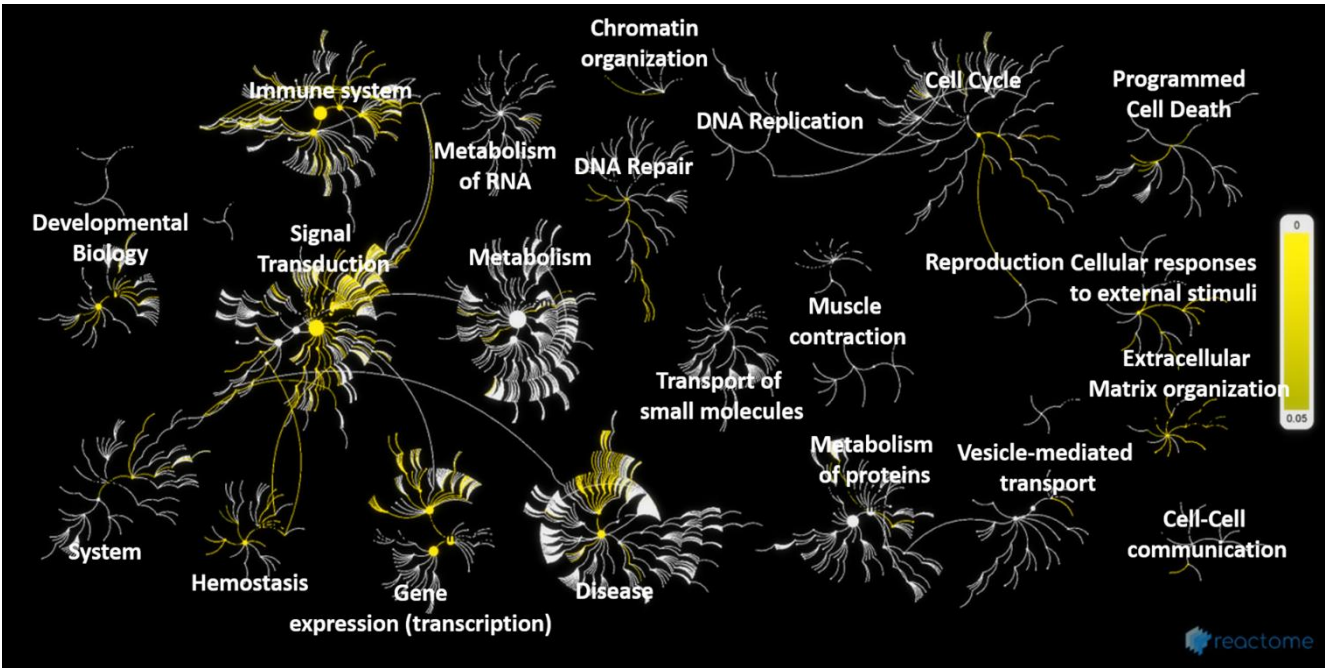

**Figure S2** Map of detected Uniprot ID's statistically analyzed by Reactome software using p-value < 0.05 and showing up-regulation of proteins in specific cellular homeostasis.

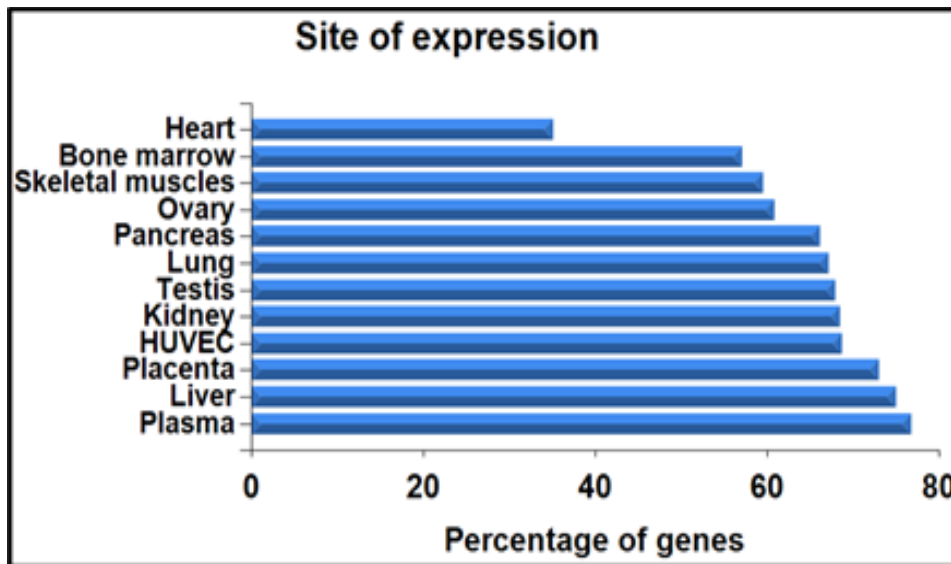

**Figure S3** FunRich analysis of genes and their site of expression. Tissue location of enriched expression for targets determined using FunRich v.3.0, which infers regional and cell type enrichment of target mRNAs for a given list of RNAs.

#### Supplementary Table-1: Information on Major Resources Used

##### Animals used in *in vivo* studies

| Species      |  | Vendor or Source       |  | Background Strain |  |
|--------------|--|------------------------|--|-------------------|--|
| Mus musculus |  | The Jackson Laboratory |  | C57Bl/6           |  |

| Animal breeding |              |                        |                    |                                       |              |                        |                    |
|-----------------|--------------|------------------------|--------------------|---------------------------------------|--------------|------------------------|--------------------|
|                 | Species      | Vendor or Source       | Back-ground Strain | Other Information                     | Species      | Vendor or Source       | Back-ground Strain |
| Parent - Male   | Mus musculus | The Jackson Laboratory | C57Bl/6            | Bred and maintained in SPF conditions | Mus musculus | The Jackson Laboratory | C57Bl/6            |
| Parent - Female | Mus musculus | The Jackson Laboratory | C57Bl/6            | Bred and maintained in SPF conditions |              |                        |                    |

##### Human Cultured Cells – MSCs isolated and cultured from Wharton's Jelly

##### Proteomic Analysis Reagents

| Name                                                                                                                                                  | Vendor or Source             |
|-------------------------------------------------------------------------------------------------------------------------------------------------------|------------------------------|
| Ethylenediaminetetraacetic acid (EDTA), acetone, formic acid, acetonitrile, sodium deoxycholate (DOC), ammonium bicarbonate, DL-dithiothreitol (DTT), | Sigma-Aldrich, Missouri, USA |

---

|                                                                                                           |                                          |
|-----------------------------------------------------------------------------------------------------------|------------------------------------------|
| iodoacetamide (IAA),<br>trizma hydrochloride (Tris-<br>HCl), N-acetyl-L-cysteine<br>(NAC), urea and water | Promega (Wisconsin, USA)                 |
| Trypsin (Gold grade)                                                                                      | Roche (Indiana, USA)                     |
| Protease Inhibitor Com-<br>plete Cocktail                                                                 | Waters (Massachusetts,<br>USA).          |
| C18 columns for solid<br>phase extraction                                                                 | Tebu-Bio, Cytoskeleton,<br>Colorado, USA |
| Advanced Protein Assay<br>ADV-01A                                                                         |                                          |

---

**Supplementary Table-2: Primers used for qRT-PCR assay**

| Primer<br>(human) | Forward primer (5'–3')   | Reverse primer (5'–3')   |
|-------------------|--------------------------|--------------------------|
| Ang-1             | CAGGAGGATGGTGGTTTGATG    | TGGTTTTGTCCCGCAGTATAGAA  |
| Tie-2             | GATTTTGGATTGTCCGAGGTCAAG | CACCAATATCTGGGCAAATGATGG |
| Endoglin          | CAATGCCAGCATTGTCACCTCC   | AGAGGCTGTCCATGTCGATGCA   |
| VEGF              | GCTACTGCCATCCAATCGAG     | TCTTTCTTTGGTCTGCATTAC    |
| VEGFR-2           | AAGTAATCCCAGATGACAACCA   | CCTTCAGATGCCACAGACTC     |
| GAPDH             | GTTTCTATAAATTGAGCCCGCAG  | CGACCAAATCCGTTGACTCC     |

**Supplementary Table-3: FunRich Analysis of Over-represented Proteins of the Cellular Component in MSCs following estradiol treatment**

---

| CELLULAR COMPO-<br>NENT | NO. OF PRO-<br>TEINS IN THE<br>DATASET | PERCENTAGE<br>OF PROTEINS | FOLD ENRICH-<br>MENT | P-VALUE |
|-------------------------|----------------------------------------|---------------------------|----------------------|---------|
|-------------------------|----------------------------------------|---------------------------|----------------------|---------|

|                                          |     |             |             |             |
|------------------------------------------|-----|-------------|-------------|-------------|
| PLASMA MEMBRANE                          | 359 | 41,07551487 | 1,631479137 | 3,69927E-26 |
| CYTOSOL                                  | 316 | 36,15560641 | 1,275540127 | 1,72999E-07 |
| CYTOPLASM                                | 262 | 29,9771167  | 1,185615856 | 0,00073998  |
| NUCLEUS                                  | 242 | 27,68878719 | 0,966772797 | 0,749718916 |
| EXTRACELLULAR EXO-SOME                   | 231 | 26,43020595 | 2,342427559 | 2,4204E-37  |
| NUCLEOPLASM                              | 178 | 20,36613272 | 1,004858387 | 0,484778077 |
| EXTRACELLULAR REGION                     | 171 | 19,56521739 | 1,876003107 | 1,22736E-16 |
| MEMBRANE                                 | 164 | 18,76430206 | 1,667814466 | 1,53755E-11 |
| EXTRACELLULAR SPACE                      | 164 | 18,76430206 | 2,131828351 | 2,25795E-21 |
| INTEGRAL COMPONENT OF PLASMA MEMBRANE    | 159 | 18,19221968 | 2,399110068 | 4,49029E-26 |
| INTEGRAL COMPONENT OF MEMBRANE           | 127 | 14,53089245 | 0,729924039 | 0,999990136 |
| MITOCHONDRION                            | 81  | 9,267734554 | 1,342016312 | 0,004024259 |
| INTRACELLULAR MEMBRANE-BOUNDED ORGANELLE | 73  | 8,352402746 | 1,787811029 | 1,00002E-06 |
| CELL SURFACE                             | 73  | 8,352402746 | 2,681701132 | 1,17538E-14 |
| GOLGI APPARATUS                          | 70  | 8,009153318 | 1,509601246 | 0,000373306 |
| PERINUCLEAR REGION OF CYTOPLASM          | 61  | 6,979405034 | 1,859435612 | 2,29834E-06 |
| ENDOPLASMIC RETICULUM                    | 57  | 6,52173913  | 1,172331952 | 0,118479301 |
| PROTEIN-CONTAINING COMPLEX               | 55  | 6,292906178 | 1,842643031 | 9,46416E-06 |
| COLLAGEN-CONTAINING EXTRACELLULAR MATRIX | 54  | 6,178489703 | 3,335078052 | 5,18435E-15 |
| ENDOPLASMIC RETICULUM MEMBRANE           | 50  | 5,720823799 | 1,099492076 | 0,261299725 |
| CHROMATIN                                | 49  | 5,606407323 | 1,086476417 | 0,292414282 |
| EXTERNAL SIDE OF PLASMA MEMBRANE         | 47  | 5,377574371 | 2,743778171 | 3,3605E-10  |
| SYNAPSE                                  | 46  | 5,263157895 | 2,462758109 | 1,65524E-08 |
| FOCAL ADHESION                           | 44  | 5,034324943 | 2,29796849  | 2,51025E-07 |
| APICAL PLASMA MEMBRANE                   | 40  | 4,576659039 | 2,456348986 | 1,5329E-07  |
| NEURON PROJECTION                        | 40  | 4,576659039 | 2,680348611 | 1,37634E-08 |
| ENDOPLASMIC RETICULUM LUMEN              | 40  | 4,576659039 | 2,813034757 | 3,42368E-09 |
| BASOLATERAL PLASMA MEMBRANE              | 39  | 4,462242563 | 3,901570566 | 2,12748E-13 |
| DENDRITE                                 | 38  | 4,347826087 | 1,994456862 | 4,28543E-05 |
| NEURONAL CELL BODY                       | 38  | 4,347826087 | 2,453772403 | 3,21393E-07 |

|                                                  |    |             |             |             |
|--------------------------------------------------|----|-------------|-------------|-------------|
| MEMBRANE RAFT                                    | 36 | 4,118993135 | 3,335338462 | 1,92058E-10 |
| MITOCHONDRIAL<br>MATRIX                          | 36 | 4,118993135 | 2,034856369 | 4,46488E-05 |
| CYTOSKELETON                                     | 33 | 3,775743707 | 1,670385153 | 0,002858631 |
| GOLGI MEMBRANE                                   | 33 | 3,775743707 | 1,204172622 | 0,15578046  |
| BLOOD MICROPARTI-<br>CLE                         | 32 | 3,661327231 | 4,802089554 | 8,20547E-14 |
| NUCLEOLUS                                        | 32 | 3,661327231 | 0,818651322 | 0,901571894 |
| CYTOPLASMIC VESI-<br>CLE                         | 31 | 3,546910755 | 2,334336674 | 1,07545E-05 |
| LYSOSOMAL MEM-<br>BRANE                          | 30 | 3,432494279 | 1,99786415  | 0,000258353 |
| GLUTAMATERGIC<br>SYNAPSE                         | 28 | 3,203661327 | 1,969335255 | 0,00051457  |
| ENDOSOME                                         | 26 | 2,974828375 | 1,94421264  | 0,000968804 |
| AXON                                             | 25 | 2,860411899 | 1,764232737 | 0,004421972 |
| LYSOSOME                                         | 25 | 2,860411899 | 1,988044957 | 0,000875804 |
| MITOCHONDRIAL IN-<br>NER MEMBRANE                | 24 | 2,745995423 | 1,275558748 | 0,133361557 |
| NUCLEAR MEMBRANE                                 | 23 | 2,631578947 | 2,09481517  | 0,000681261 |
| MITOCHONDRIAL<br>OUTER MEMBRANE                  | 22 | 2,517162471 | 2,664073532 | 2,72443E-05 |
| SECRETORY GRANULE<br>LUMEN                       | 22 | 2,517162471 | 4,077067928 | 1,62045E-08 |
| ACTIN CYTOSKELE-<br>TON                          | 22 | 2,517162471 | 2,021049017 | 0,001408814 |
| POSTSYNAPTIC MEM-<br>BRANE                       | 21 | 2,402745995 | 3,266910933 | 1,64352E-06 |
| CELL CORTEX                                      | 21 | 2,402745995 | 3,174239181 | 2,64308E-06 |
| NUCLEAR BODY                                     | 20 | 2,288329519 | 1,340509265 | 0,113443136 |
| CELL-CELL JUNCTION                               | 20 | 2,288329519 | 2,492809493 | 0,000157469 |
| RECEPTOR COMPLEX                                 | 20 | 2,288329519 | 2,039593088 | 0,002040256 |
| CENTROSOME                                       | 19 | 2,173913043 | 0,803538096 | 0,866465355 |
| POSTSYNAPTIC DEN-<br>SITY                        | 19 | 2,173913043 | 1,701572354 | 0,017110058 |
| CLATHRIN-COATED<br>ENDOCYTIC VESICLE<br>MEMBRANE | 19 | 2,173913043 | 5,78476269  | 3,11215E-10 |
| EXTRACELLULAR MA-<br>TRIX                        | 19 | 2,173913043 | 1,646238917 | 0,023272424 |
| ADHERENS JUNCTION                                | 18 | 2,059496568 | 2,383001804 | 0,000570237 |
| CAVEOLA                                          | 18 | 2,059496568 | 5,480461654 | 2,37491E-09 |
| FICOLIN-1-RICH<br>GRANULE LUMEN                  | 18 | 2,059496568 | 3,094001455 | 1,93054E-05 |
| ENDOSOME MEM-<br>BRANE                           | 18 | 2,059496568 | 1,675416446 | 0,022885963 |
| VESICLE                                          | 17 | 1,945080092 | 2,337804044 | 0,000995228 |
| LATERAL PLASMA<br>MEMBRANE                       | 17 | 1,945080092 | 5,939731272 | 1,7095E-09  |

|                                                    |    |             |             |             |
|----------------------------------------------------|----|-------------|-------------|-------------|
| ANCHORED COMPONENT OF MEMBRANE                     | 17 | 1,945080092 | 3,587595336 | 4,35362E-06 |
| DENDRITIC SPINE                                    | 17 | 1,945080092 | 2,399728527 | 0,000740813 |
| Z DISC                                             | 16 | 1,830663616 | 2,818600854 | 0,000170623 |
| NUCLEAR SPECK                                      | 16 | 1,830663616 | 0,833913326 | 0,806986749 |
| MELANOSOME                                         | 15 | 1,71624714  | 3,165773427 | 7,16038E-05 |
| CELL JUNCTION                                      | 15 | 1,71624714  | 1,614942548 | 0,046636077 |
| SECRETORY GRANULE MEMBRANE                         | 15 | 1,71624714  | 3,26267497  | 5,01168E-05 |
| SARCOLEMMMA                                        | 15 | 1,71624714  | 3,365695967 | 3,45094E-05 |
| MICROVILLUS                                        | 15 | 1,71624714  | 4,844338341 | 2,98659E-07 |
| LAMELLIPODIUM                                      | 14 | 1,601830664 | 1,667340698 | 0,042760649 |
| POSTSYNAPSE                                        | 14 | 1,601830664 | 3,279536956 | 8,36431E-05 |
| EARLY ENDOSOME                                     | 14 | 1,601830664 | 1,139157507 | 0,347820517 |
| NUCLEAR ENVELOPE                                   | 14 | 1,601830664 | 1,676707254 | 0,041109444 |
| SPECIFIC GRANULE MEMBRANE                          | 14 | 1,601830664 | 3,279536956 | 8,36431E-05 |
| MITOCHONDRIAL MEMBRANE                             | 13 | 1,487414188 | 2,368742354 | 0,003349575 |
| ENDOCYTIC VESICLE MEMBRANE                         | 13 | 1,487414188 | 4,016324342 | 1,65191E-05 |
| CELL PROJECTION                                    | 13 | 1,487414188 | 2,199559899 | 0,006295037 |
| PRESYNAPSE                                         | 12 | 1,372997712 | 2,368877209 | 0,004725399 |
| TRANS-GOLGI NETWORK MEMBRANE                       | 12 | 1,372997712 | 2,584207932 | 0,002295766 |
| PLATELET ALPHA GRANULE LUMEN                       | 12 | 1,372997712 | 3,818272307 | 5,8629E-05  |
| TRANSCRIPTION REGULATOR COMPLEX                    | 12 | 1,372997712 | 1,325643372 | 0,197098051 |
| T-TUBULE                                           | 12 | 1,372997712 | 6,090512433 | 3,18585E-07 |
| EARLY ENDOSOME MEMBRANE                            | 12 | 1,372997712 | 1,541247077 | 0,091400199 |
| LYSOSOMAL LUMEN                                    | 12 | 1,372997712 | 2,721651179 | 0,001467589 |
| CATENIN COMPLEX                                    | 12 | 1,372997712 | 8,525905609 | 4,19757E-09 |
| EXTRACELLULAR VESICLE                              | 12 | 1,372997712 | 4,651198461 | 7,19838E-06 |
| PEROXISOME                                         | 11 | 1,258581236 | 2,212605526 | 0,010985727 |
| TERTIARY GRANULE MEMBRANE                          | 11 | 1,258581236 | 3,212687465 | 0,000566622 |
| CYCLIN-DEPENDENT PROTEIN KINASE HOLOENZYME COMPLEX | 11 | 1,258581236 | 7,816005058 | 5,50228E-08 |
| BASAL PLASMA MEMBRANE                              | 10 | 1,14416476  | 4,26423108  | 9,15579E-05 |
| APICAL PART OF CELL                                | 10 | 1,14416476  | 3,331576258 | 0,000746245 |
| RECYCLING ENDOSOME                                 | 10 | 1,14416476  | 1,692359307 | 0,072590643 |
| GROWTH CONE                                        | 10 | 1,14416476  | 1,57954371  | 0,103101942 |

|                                                                   |    |             |             |             |
|-------------------------------------------------------------------|----|-------------|-------------|-------------|
| <b>BASEMENT MEMBRANE</b>                                          | 10 | 1,14416476  | 2,538438237 | 0,005873203 |
| <b>MIDBODY</b>                                                    | 10 | 1,14416476  | 1,300251182 | 0,242177495 |
| <b>VOLTAGE-GATED CALCIUM CHANNEL COMPLEX</b>                      | 10 | 1,14416476  | 7,895379352 | 2,00706E-07 |
| <b>BICELLULAR TIGHT JUNCTION</b>                                  | 9  | 1,029748284 | 1,654599438 | 0,095263175 |
| <b>CYTOPLASMIC VESICLE MEMBRANE</b>                               | 9  | 1,029748284 | 1,351665944 | 0,223752527 |
| <b>SPECIFIC GRANULE LUMEN</b>                                     | 9  | 1,029748284 | 3,095469775 | 0,002301617 |
| <b>TERTIARY GRANULE LUMEN</b>                                     | 9  | 1,029748284 | 3,489367038 | 0,000966057 |
| <b>HIGH-DENSITY LIPO-PROTEIN PARTICLE</b>                         | 9  | 1,029748284 | 7,994588954 | 7,33781E-07 |
| <b>SYNAPTIC VESICLE</b>                                           | 9  | 1,029748284 | 1,573232364 | 0,119995005 |
| <b>TERMINAL BOUTON</b>                                            | 9  | 1,029748284 | 3,916549292 | 0,000401302 |
| <b>LATE ENDOSOME</b>                                              | 9  | 1,029748284 | 1,380836492 | 0,20635112  |
| <b>RUFFLE MEMBRANE</b>                                            | 9  | 1,029748284 | 2,086187162 | 0,028616054 |
| <b>ACETYLCHOLINE-GATED CHANNEL COMPLEX</b>                        | 9  | 1,029748284 | 11,98938668 | 9,0232E-09  |
| <b>EXTRINSIC COMPONENT OF CYTOPLASMIC SIDE OF PLASMA MEMBRANE</b> | 9  | 1,029748284 | 2,864499042 | 0,003940688 |
| <b>TRANS-GOLGI NETWORK</b>                                        | 9  | 1,029748284 | 1,09679493  | 0,438147336 |
| <b>FICOLIN-1-RICH GRANULE MEMBRANE</b>                            | 9  | 1,029748284 | 3,146206864 | 0,002051179 |
| <b>CHROMOSOME</b>                                                 | 9  | 1,029748284 | 0,954928017 | 0,605359635 |
| <b>SODIUM:POTASSIUM-EXCHANGING ATPASE COMPLEX</b>                 | 9  | 1,029748284 | 15,9825213  | 2,05803E-10 |

**Supplementary Table-4: FunRich Analysis of Over-represented Proteins of the Molecular Function in MSCs following estradiol treatment**

| MOLECULAR FUNCTION                                                       | NO. OF PROTEINS IN THE DATASET | PERCENTAGE OF PROTEINS | FOLD ENRICHMENT | P-VALUE     |
|--------------------------------------------------------------------------|--------------------------------|------------------------|-----------------|-------------|
| IDENTICAL PROTEIN BINDING                                                | 157                            | 18,47058824            | 1,836811434     | 1,29144E-14 |
| ATP BINDING                                                              | 124                            | 14,58823529            | 1,566971806     | 2,19995E-07 |
| METAL ION BINDING                                                        | 95                             | 11,17647059            | 0,757664215     | 0,99924305  |
| PROTEIN HOMODIMERIZATION ACTIVITY                                        | 72                             | 8,470588235            | 1,965224811     | 2,62774E-08 |
| ZINC ION BINDING                                                         | 63                             | 7,411764706            | 1,406204203     | 0,003787567 |
| CALCIUM ION BINDING                                                      | 61                             | 7,176470588            | 1,585959553     | 0,000234627 |
| PROTEIN KINASE BINDING                                                   | 57                             | 6,705882353            | 2,291768997     | 3,81048E-09 |
| RNA BINDING                                                              | 49                             | 5,764705882            | 0,660538368     | 0,999638849 |
| SIGNALING RECEPTOR BINDING                                               | 45                             | 5,294117647            | 2,314187884     | 1,29467E-07 |
| DNA-BINDING TRANSCRIPTION FACTOR ACTIVITY, RNA POLYMERASE II-SPECIFIC    | 44                             | 5,176470588            | 0,651144603     | 0,999539221 |
| DNA BINDING                                                              | 42                             | 4,941176471            | 0,871697031     | 0,846574645 |
| RNA POLYMERASE II CIS-REGULATORY REGION SEQUENCE-SPECIFIC DNA BINDING    | 42                             | 4,941176471            | 0,663201291     | 0,998991018 |
| PROTEIN HETERODIMERIZATION ACTIVITY                                      | 40                             | 4,705882353            | 2,394442256     | 2,63335E-07 |
| PROTEIN-CONTAINING COMPLEX BINDING                                       | 38                             | 4,470588235            | 2,044651941     | 2,28124E-05 |
| ENZYME BINDING                                                           | 36                             | 4,235294118            | 1,851453137     | 0,000277922 |
| SEQUENCE-SPECIFIC DOUBLE-STRANDED DNA BINDING                            | 36                             | 4,235294118            | 1,214189145     | 0,131887415 |
| DNA-BINDING TRANSCRIPTION FACTOR ACTIVITY                                | 32                             | 3,764705882            | 1,347918858     | 0,053219234 |
| TRANSCRIPTION FACTOR BINDING                                             | 31                             | 3,647058824            | 1,9631335       | 0,00026308  |
| CHROMATIN BINDING                                                        | 31                             | 3,647058824            | 1,36446155      | 0,049434855 |
| PROTEIN SERINE KINASE ACTIVITY                                           | 29                             | 3,411764706            | 1,495679932     | 0,020143717 |
| PROTEIN THREONINE KINASE ACTIVITY                                        | 29                             | 3,411764706            | 1,495679932     | 0,020143717 |
| CADHERIN BINDING                                                         | 28                             | 3,294117647            | 1,703678567     | 0,004233932 |
| DNA-BINDING TRANSCRIPTION ACTIVATOR ACTIVITY, RNA POLYMERASE II-SPECIFIC | 27                             | 3,176470588            | 1,163699786     | 0,233584181 |
| PROTEIN SERINE/THREONINE KINASE ACTIVITY                                 | 26                             | 3,058823529            | 1,629969397     | 0,009939635 |
| ACTIN FILAMENT BINDING                                                   | 26                             | 3,058823529            | 2,408423514     | 2,90682E-05 |
| G PROTEIN-COUPLED RECEPTOR ACTIVITY                                      | 25                             | 2,941176471            | 0,651957923     | 0,993456604 |
| GTP BINDING                                                              | 25                             | 2,941176471            | 1,228211595     | 0,168942863 |
| GROWTH FACTOR ACTIVITY                                                   | 25                             | 2,941176471            | 2,873307058     | 1,7735E-06  |
| PROTEIN KINASE ACTIVITY                                                  | 23                             | 2,705882353            | 2,109644887     | 0,000585252 |

|                                                                                              |    |             |             |             |
|----------------------------------------------------------------------------------------------|----|-------------|-------------|-------------|
| CALMODULIN BINDING                                                                           | 23 | 2,705882353 | 2,162916058 | 0,000410759 |
| ACTIN BINDING                                                                                | 21 | 2,470588235 | 1,41169467  | 0,070730494 |
| ATPASE ACTIVITY                                                                              | 21 | 2,470588235 | 1,515652652 | 0,038310574 |
| GTPASE ACTIVITY                                                                              | 20 | 2,352941176 | 1,237303766 | 0,192216393 |
| UBIQUITIN PROTEIN LIGASE<br>BINDING                                                          | 19 | 2,235294118 | 1,20756313  | 0,229734156 |
| PROTEIN C-TERMINUS BIND-<br>ING                                                              | 18 | 2,117647059 | 1,718964867 | 0,017783006 |
| TRANSMEMBRANE SIGNAL-<br>ING RECEPTOR ACTIVITY                                               | 18 | 2,117647059 | 2,019247869 | 0,003576231 |
| SIGNALING RECEPTOR AC-<br>TIVITY                                                             | 18 | 2,117647059 | 1,581129847 | 0,037022138 |
| ION CHANNEL BINDING                                                                          | 17 | 2           | 2,416629302 | 0,000647186 |
| PROTEASE BINDING                                                                             | 17 | 2           | 3,165709477 | 2,18347E-05 |
| CHAPERONE BINDING                                                                            | 17 | 2           | 3,103642827 | 2,8482E-05  |
| RNA POLYMERASE II TRAN-<br>SCRIPTION REGULATORY RE-<br>GION SEQUENCE-SPECIFIC<br>DNA BINDING | 17 | 2           | 0,959372761 | 0,606720621 |
| CYTOKINE ACTIVITY                                                                            | 17 | 2           | 1,702073033 | 0,022719701 |
| TRANSCRIPTION REGULA-<br>TORY REGION SEQUENCE-<br>SPECIFIC DNA BINDING                       | 17 | 2           | 1,522054732 | 0,056158194 |
| HEPARIN BINDING                                                                              | 16 | 1,882352941 | 1,805889769 | 0,016132492 |
| INTEGRIN BINDING                                                                             | 16 | 1,882352941 | 2,083699537 | 0,004294788 |
| TRANSCRIPTION COACTIVA-<br>TOR ACTIVITY                                                      | 16 | 1,882352941 | 1,267988047 | 0,197233254 |
| LIPID BINDING                                                                                | 16 | 1,882352941 | 2,174949791 | 0,002799927 |
| PROTEIN DOMAIN SPECIFIC<br>BINDING                                                           | 15 | 1,764705882 | 1,214630394 | 0,25557162  |
| AMYLOID-BETA BINDING                                                                         | 15 | 1,764705882 | 3,365584109 | 3,13143E-05 |
| GTPASE ACTIVATOR ACTIV-<br>ITY                                                               | 14 | 1,647058824 | 0,983979483 | 0,565129956 |
| NEUROTRANSMITTER RECEP-<br>TOR ACTIVITY                                                      | 14 | 1,647058824 | 3,17966593  | 0,000108687 |
| SMALL GTPASE BINDING                                                                         | 14 | 1,647058824 | 1,091018798 | 0,408724482 |
| IRON ION BINDING                                                                             | 14 | 1,647058824 | 2,085948347 | 0,007219503 |
| PROTEIN-MACROMOLECULE<br>ADAPTOR ACTIVITY                                                    | 14 | 1,647058824 | 2,929607942 | 0,000266307 |
| CARBOHYDRATE BINDING                                                                         | 14 | 1,647058824 | 1,473161985 | 0,095267815 |
| ATPASE BINDING                                                                               | 13 | 1,529411765 | 2,848508045 | 0,000576716 |
| TRANSMEMBRANE RECEPTOR<br>PROTEIN TYROSINE KINASE<br>ACTIVITY                                | 13 | 1,529411765 | 2,105483601 | 0,00874615  |
| STRUCTURAL MOLECULE AC-<br>TIVITY                                                            | 13 | 1,529411765 | 1,32316086  | 0,186037337 |
| MAGNESIUM ION BINDING                                                                        | 12 | 1,411764706 | 1,03966762  | 0,488428552 |
| PHOSPHOLIPID BINDING                                                                         | 12 | 1,411764706 | 2,050627786 | 0,014016863 |

|                                                                          |    |             |             |             |
|--------------------------------------------------------------------------|----|-------------|-------------|-------------|
| SEQUENCE-SPECIFIC DNA BINDING                                            | 12 | 1,411764706 | 0,916105631 | 0,665287731 |
| EXTRACELLULAR MATRIX STRUCTURAL CONSTITUENT                              | 12 | 1,411764706 | 2,213037669 | 0,007854907 |
| VOLTAGE-GATED CALCIUM CHANNEL ACTIVITY                                   | 12 | 1,411764706 | 5,881055905 | 3,96428E-07 |
| VIRUS RECEPTOR ACTIVITY                                                  | 11 | 1,294117647 | 2,696042639 | 0,002355548 |
| HYDROLASE ACTIVITY                                                       | 11 | 1,294117647 | 2,561257355 | 0,003549204 |
| TRANSCRIPTION COREPRESSOR ACTIVITY                                       | 11 | 1,294117647 | 1,113668828 | 0,402089529 |
| HEME BINDING                                                             | 11 | 1,294117647 | 1,463654032 | 0,132690501 |
| SERINE-TYPE ENDOPEPTIDASE ACTIVITY                                       | 11 | 1,294117647 | 1,249473819 | 0,267207748 |
| HORMONE ACTIVITY                                                         | 11 | 1,294117647 | 2,049057104 | 0,018302037 |
| DNA-BINDING TRANSCRIPTION REPRESSOR ACTIVITY, RNA POLYMERASE II-SPECIFIC | 11 | 1,294117647 | 0,665323207 | 0,94600891  |
| BETA-CATENIN BINDING                                                     | 11 | 1,294117647 | 2,410612881 | 0,0056737   |
| SERINE-TYPE ENDOPEPTIDASE INHIBITOR ACTIVITY                             | 10 | 1,176470588 | 1,862948375 | 0,042199296 |
| PROTEIN TYROSINE KINASE ACTIVITY                                         | 10 | 1,176470588 | 2,517409364 | 0,006024298 |
| MICROTUBULE BINDING                                                      | 10 | 1,176470588 | 0,736387759 | 0,878690228 |
| COLLAGEN BINDING                                                         | 10 | 1,176470588 | 3,053818505 | 0,001414136 |
| STRUCTURAL CONSTITUENT OF CYTOSKELETON                                   | 10 | 1,176470588 | 1,844505168 | 0,044685052 |
| COPPER ION BINDING                                                       | 10 | 1,176470588 | 3,449610572 | 0,000526754 |
| CYSTEINE-TYPE ENDOPEPTIDASE ACTIVITY                                     | 10 | 1,176470588 | 2,02492628  | 0,025642175 |
| PROTEIN N-TERMINUS BINDING                                               | 9  | 1,058823529 | 1,612352015 | 0,106594737 |
| CALCIUM-DEPENDENT PROTEIN BINDING                                        | 9  | 1,058823529 | 1,927373096 | 0,043632368 |
| HISTONE BINDING                                                          | 9  | 1,058823529 | 1,004135878 | 0,544908784 |
| ATPASE-COUPLED TRANSMEMBRANE TRANSPORTER ACTIVITY                        | 9  | 1,058823529 | 3,644875745 | 0,000653609 |
| CHOLESTEROL BINDING                                                      | 9  | 1,058823529 | 3,287605039 | 0,001419738 |
| LIPID TRANSPORTER ACTIVITY                                               | 9  | 1,058823529 | 6,705347183 | 3,34842E-06 |
| ACETYLCHOLINE BINDING                                                    | 9  | 1,058823529 | 13,9634249  | 6,80363E-10 |
| ACETYLCHOLINE-GATED CATION-SELECTIVE CHANNEL ACTIVITY                    | 9  | 1,058823529 | 10,4747491  | 2,90879E-08 |
| EPIDERMAL GROWTH FACTOR RECEPTOR BINDING                                 | 9  | 1,058823529 | 5,08030091  | 4,28584E-05 |
| ALDEHYDE DEHYDROGENASE (NAD+) ACTIVITY                                   | 9  | 1,058823529 | 12,8901409  | 2,10548E-09 |

|                                                                       |   |             |             |             |
|-----------------------------------------------------------------------|---|-------------|-------------|-------------|
| PROTON-TRANSPORTING<br>ATP SYNTHASE ACTIVITY,<br>ROTATIONAL MECHANISM | 9 | 1,058823529 | 13,9634249  | 6,80363E-10 |
| CYCLIN-DEPENDENT PRO-<br>TEIN SERINE/THREONINE KI-<br>NASE ACTIVITY   | 9 | 1,058823529 | 5,780790522 | 1,35131E-05 |

**Supplementary Table-5: FunRich Analysis of Over-represented Proteins of the Biological Process in MSCs following estradiol treatment**

| BIOLOGICAL PROCESS                                              | NO. OF PROTEINS<br>IN THE DATASET | PERCENTAGE OF<br>PROTEINS | FOLD ENRICH-<br>MENT | P-VALUE     |
|-----------------------------------------------------------------|-----------------------------------|---------------------------|----------------------|-------------|
| SIGNAL TRANSDUCTION                                             | 92                                | 10,57471264               | 1,874862069          | 3,18916E-09 |
| G PROTEIN-COUPLED RECEPTOR<br>SIGNALING PATHWAY                 | 82                                | 9,425287356               | 2,159146954          | 2,95236E-11 |
| POSITIVE REGULATION OF<br>TRANSCRIPTION BY RNA<br>POLYMERASE II | 79                                | 9,08045977                | 1,564338632          | 4,70269E-05 |
| NEUTROPHIL DEGRANULATION                                        | 67                                | 7,701149425               | 2,719528525          | 6,50471E-14 |
| REGULATION OF TRANSCRIPTION<br>BY RNA POLYMERASE II             | 66                                | 7,586206897               | 0,839031643          | 0,947829279 |
| NEGATIVE REGULATION OF<br>APOPTOTIC PROCESS                     | 62                                | 7,126436782               | 2,495896517          | 2,48914E-11 |
| POSITIVE REGULATION OF<br>CELL POPULATION PROLIF-<br>ERATION    | 58                                | 6,666666667               | 2,301744881          | 2,55414E-09 |
| CELL ADHESION                                                   | 54                                | 6,206896552               | 2,169433526          | 6,91096E-08 |
| APOPTOTIC PROCESS                                               | 53                                | 6,091954023               | 1,949162546          | 2,58171E-06 |
| RESPONSE TO DRUG                                                | 48                                | 5,517241379               | 3,65419512           | 3,85807E-15 |
| NEGATIVE REGULATION OF<br>TRANSCRIPTION BY RNA<br>POLYMERASE II | 46                                | 5,287356322               | 1,123632635          | 0,224145819 |
| ION TRANSMEMBRANE<br>TRANSPORT                                  | 45                                | 5,172413793               | 4,974177284          | 1,06726E-19 |
| POSITIVE REGULATION OF<br>GENE EXPRESSION                       | 43                                | 4,942528736               | 2,151749085          | 1,8773E-06  |
| POSITIVE REGULATION OF<br>TRANSCRIPTION, DNA-TEM-<br>PLATED     | 42                                | 4,827586207               | 1,505088834          | 0,005496002 |
| POSITIVE REGULATION OF<br>APOPTOTIC PROCESS                     | 42                                | 4,827586207               | 2,409881101          | 1,17546E-07 |
| CELL DIFFERENTIATION                                            | 42                                | 4,827586207               | 1,367354211          | 0,024865332 |
| INFLAMMATORY RESPONSE                                           | 41                                | 4,712643678               | 2,072896562          | 8,17379E-06 |
| VIRAL PROCESS                                                   | 38                                | 4,367816092               | 1,581979387          | 0,003589858 |

|                                                                    |    |             |             |             |
|--------------------------------------------------------------------|----|-------------|-------------|-------------|
| PROTEIN PHOSPHORYLA-TION                                           | 38 | 4,367816092 | 2,009529828 | 3,47001E-05 |
| INNATE IMMUNE RESPONSE                                             | 36 | 4,137931034 | 1,262383148 | 0,08957068  |
| CELL SURFACE RECEPTOR SIGNALING PATHWAY                            | 36 | 4,137931034 | 2,489037209 | 4,28016E-07 |
| POSITIVE REGULATION OF CYTOSOLIC CALCIUM ION CONCENTRATION         | 33 | 3,793103448 | 4,333513548 | 5,90563E-13 |
| RESPONSE TO HYPOXIA                                                | 33 | 3,793103448 | 4,112711634 | 2,76763E-12 |
| IMMUNE RESPONSE                                                    | 33 | 3,793103448 | 1,60228494  | 0,005281699 |
| CELL-CELL SIGNALING                                                | 32 | 3,67816092  | 2,734269238 | 2,24174E-07 |
| CYTOKINE-MEDIATED SIG-NALING PATHWAY                               | 30 | 3,448275862 | 1,983214374 | 0,000282828 |
| NEGATIVE REGULATION OF CELL POPULATION PROLIF-ERATION              | 30 | 3,448275862 | 1,505221115 | 0,017109296 |
| REGULATION OF TRAN-SCRIPTION, DNA-TEM-PLATED                       | 30 | 3,448275862 | 1,233275114 | 0,138537003 |
| CHEMICAL SYNAPTIC TRANSMISSION                                     | 29 | 3,333333333 | 2,149499759 | 8,86663E-05 |
| CELLULAR PROTEIN META-BOLIC PROCESS                                | 28 | 3,218390805 | 3,701963216 | 1,59999E-09 |
| ANGIOGENESIS                                                       | 28 | 3,218390805 | 2,392592357 | 1,70654E-05 |
| ADAPTIVE IMMUNE RE-SPONSE                                          | 26 | 2,988505747 | 1,259384333 | 0,134963921 |
| CELL DIVISION                                                      | 26 | 2,988505747 | 1,445424461 | 0,038588093 |
| POSITIVE REGULATION OF ERK1 AND ERK2 CASCADE                       | 26 | 2,988505747 | 2,518706324 | 1,36512E-05 |
| SPERMATOGENESIS                                                    | 26 | 2,988505747 | 1,247037731 | 0,145792857 |
| REGULATION OF APOPTOTIC PROCESS                                    | 26 | 2,988505747 | 2,388638395 | 3,47536E-05 |
| MULTICELLULAR ORGANISM DEVELOPMENT                                 | 26 | 2,988505747 | 1,05340234  | 0,421391185 |
| NEGATIVE REGULATION OF TRANSCRIPTION, DNA-TEM-PLATED               | 25 | 2,873563218 | 0,953669536 | 0,627581822 |
| NERVOUS SYSTEM DEVELOP-MENT                                        | 25 | 2,873563218 | 1,443149196 | 0,0425438   |
| NEGATIVE REGULATION OF INFLAMMATORY RESPONSE TO ANTIGENIC STIMULUS | 25 | 2,873563218 | 2,374845924 | 5,37881E-05 |
| POST-TRANSLATIONAL PRO-TEIN MODIFICATION                           | 25 | 2,873563218 | 1,4221738   | 0,049064696 |
| INTRACELLULAR PROTEIN TRANSPORT                                    | 24 | 2,75862069  | 1,683381073 | 0,009001882 |
| NEGATIVE REGULATION OF GENE EXPRESSION                             | 24 | 2,75862069  | 2,257969103 | 0,000166042 |
| CELLULAR RESPONSE TO DNA DAMAGE STIMULUS                           | 24 | 2,75862069  | 1,886189925 | 0,002180068 |

|                                                                           |    |             |             |             |
|---------------------------------------------------------------------------|----|-------------|-------------|-------------|
| POSITIVE REGULATION OF CELL MIGRATION                                     | 24 | 2,75862069  | 2,033159401 | 0,000781113 |
| EXTRACELLULAR MATRIX ORGANIZATION                                         | 23 | 2,643678161 | 1,793228547 | 0,004981912 |
| POSITIVE REGULATION OF PROTEIN KINASE B SIGNALING                         | 23 | 2,643678161 | 2,542897563 | 3,62291E-05 |
| MEMBRANE ORGANIZATION                                                     | 23 | 2,643678161 | 3,629693554 | 6,69639E-08 |
| CELL MIGRATION                                                            | 22 | 2,528735632 | 1,855766743 | 0,00396844  |
| PLATELET DEGRANULATION                                                    | 22 | 2,528735632 | 3,444176002 | 3,35396E-07 |
| ADENYLATE CYCLASE-ACTIVATING G PROTEIN-COUPLED RECEPTOR SIGNALING PATHWAY | 22 | 2,528735632 | 3,648474214 | 1,17102E-07 |
| REGULATION OF IMMUNE RESPONSE                                             | 22 | 2,528735632 | 2,059980106 | 0,001069158 |
| RESPONSE TO ETHANOL                                                       | 21 | 2,413793103 | 3,989851339 | 4,5194E-08  |
| AGING                                                                     | 21 | 2,413793103 | 2,617633185 | 5,08766E-05 |
| POSITIVE REGULATION OF ANGIOGENESIS                                       | 21 | 2,413793103 | 3,13712378  | 2,97569E-06 |
| POSITIVE REGULATION OF PROTEIN PHOSPHORYLATION                            | 21 | 2,413793103 | 2,270562877 | 0,000385165 |
| REGULATION OF GENE EXPRESSION                                             | 21 | 2,413793103 | 1,726795456 | 0,010669353 |
| LEUKOCYTE MIGRATION                                                       | 20 | 2,298850575 | 2,017590489 | 0,002262449 |
| PROTEOLYSIS                                                               | 20 | 2,298850575 | 1,547103793 | 0,035652463 |
| MAPK CASCADE                                                              | 19 | 2,183908046 | 1,367122073 | 0,104557025 |
| INTRACELLULAR SIGNAL TRANSDUCTION                                         | 19 | 2,183908046 | 0,991629224 | 0,549851836 |
| IN UTERO EMBRYONIC DEVELOPMENT                                            | 19 | 2,183908046 | 2,124855009 | 0,001588564 |
| HEART DEVELOPMENT                                                         | 19 | 2,183908046 | 1,946866003 | 0,004267942 |
| RESPONSE TO LIPOPOLYSACCHARIDE                                            | 19 | 2,183908046 | 2,694521232 | 7,7039E-05  |
| REGULATION OF COMPLEMENT ACTIVATION                                       | 19 | 2,183908046 | 3,319979244 | 3,70665E-06 |
| PROTEIN STABILIZATION                                                     | 18 | 2,068965517 | 1,797403293 | 0,011805947 |
| PROTEIN AUTOPHOSPHORYLATION                                               | 18 | 2,068965517 | 2,036350613 | 0,003315938 |
| SKELETAL SYSTEM DEVELOPMENT                                               | 18 | 2,068965517 | 2,773868353 | 8,05671E-05 |
| ACTIN FILAMENT ORGANIZATION                                               | 17 | 1,954022989 | 2,619850122 | 0,00025473  |
| CALCIUM ION TRANSPORT                                                     | 17 | 1,954022989 | 4,377676147 | 2,1078E-07  |
| REGULATION OF SMALL GTPASE MEDIATED SIGNAL TRANSDUCTION                   | 17 | 1,954022989 | 2,428634143 | 0,000624811 |
| CELLULAR RESPONSE TO LIPOPOLYSACCHARIDE                                   | 17 | 1,954022989 | 2,174675929 | 0,002137849 |

|                                                                               |    |             |             |             |
|-------------------------------------------------------------------------------|----|-------------|-------------|-------------|
| <b>BMP SIGNALING PATHWAY</b>                                                  | 17 | 1,954022989 | 4,557556005 | 1,12634E-07 |
| <b>PROTEIN-CONTAINING<br/>COMPLEX ASSEMBLY</b>                                | 16 | 1,83908046  | 2,485400431 | 0,000692574 |
| <b>CELLULAR CALCIUM ION<br/>HOMEOSTASIS</b>                                   | 16 | 1,83908046  | 3,228381696 | 3,06194E-05 |
| <b>POSITIVE REGULATION OF<br/>PEPTIDYL-TYROSINE PHOS-<br/>PHORYLATION</b>     | 16 | 1,83908046  | 3,641266229 | 6,3173E-06  |
| <b>LOCOMOTORY BEHAVIOR</b>                                                    | 16 | 1,83908046  | 4,538259793 | 2,82646E-07 |
| <b>DNA REPAIR</b>                                                             | 16 | 1,83908046  | 1,423504879 | 0,099185833 |
| <b>BLOOD COAGULATION</b>                                                      | 16 | 1,83908046  | 1,831385933 | 0,014412001 |
| <b>POSITIVE REGULATION OF<br/>NF-KAPPAB TRANSCRIPTION<br/>FACTOR ACTIVITY</b> | 16 | 1,83908046  | 1,933123315 | 0,008872985 |
| <b>CELLULAR RESPONSE TO ME-<br/>CHANICAL STIMULUS</b>                         | 16 | 1,83908046  | 4,23166205  | 7,81517E-07 |
| <b>LIPID METABOLIC PROCESS</b>                                                | 16 | 1,83908046  | 2,302663836 | 0,001579132 |
| <b>VISUAL PERCEPTION</b>                                                      | 16 | 1,83908046  | 1,527658691 | 0,061182579 |
| <b>REGULATION OF CARDIAC<br/>CONDUCTION</b>                                   | 16 | 1,83908046  | 5,908042036 | 4,73609E-09 |
| <b>ACTIN CYTOSKELETON OR-<br/>GANIZATION</b>                                  | 16 | 1,83908046  | 2,115973977 | 0,003744281 |
| <b>PROTEIN DEUBIQUITINA-<br/>TION</b>                                         | 16 | 1,83908046  | 1,181786756 | 0,281787761 |
| <b>CELL-CELL ADHESION</b>                                                     | 16 | 1,83908046  | 2,39054506  | 0,001059481 |
| <b>RECEPTOR-MEDIATED EN-<br/>DOCYTOSIS</b>                                    | 16 | 1,83908046  | 1,957285847 | 0,007910805 |
| <b>CELL POPULATION PROLIF-<br/>ERATION</b>                                    | 16 | 1,83908046  | 2,372436242 | 0,001149827 |
| <b>PROTON TRANSMEMBRANE<br/>TRANSPORT</b>                                     | 16 | 1,83908046  | 6,390232776 | 1,29533E-09 |
| <b>REGULATION OF CELL CYCLE</b>                                               | 16 | 1,83908046  | 2,954299673 | 9,26446E-05 |
| <b>REGULATION OF CYTOSOLIC<br/>CALCIUM ION CONCENTRA-<br/>TION</b>            | 15 | 1,724137931 | 7,159801334 | 6,86833E-10 |
| <b>CELLULAR RESPONSE TO HY-<br/>POXIA</b>                                     | 15 | 1,724137931 | 2,575418408 | 0,000692245 |
| <b>POSITIVE REGULATION OF I-<br/>KAPPAB KINASE/NF-KAPPAB<br/>SIGNALING</b>    | 15 | 1,724137931 | 1,604412069 | 0,048486392 |
| <b>REGULATION OF MEM-<br/>BRANE POTENTIAL</b>                                 | 15 | 1,724137931 | 2,995851982 | 0,000129563 |
| <b>RESPONSE TO ESTRADIOL</b>                                                  | 15 | 1,724137931 | 3,226276813 | 5,42414E-05 |
| <b>PROTEIN TRANSPORT</b>                                                      | 15 | 1,724137931 | 0,889741077 | 0,717081226 |
| <b>POSITIVE REGULATION OF<br/>MAPK CASCADE</b>                                | 15 | 1,724137931 | 2,645018041 | 0,000520402 |
| <b>POSITIVE REGULATION OF<br/>PEPTIDYL-SERINE PHOS-<br/>PHORYLATION</b>       | 15 | 1,724137931 | 3,26212035  | 4,7509E-05  |

|                                                                                   |    |             |             |             |
|-----------------------------------------------------------------------------------|----|-------------|-------------|-------------|
| NEGATIVE REGULATION OF NEURON APOPTOTIC PROCESS                                   | 15 | 1,724137931 | 2,311813658 | 0,002098101 |
| XENOBIOTIC METABOLIC PROCESS                                                      | 15 | 1,724137931 | 3,336251025 | 3,62073E-05 |
| BRAIN DEVELOPMENT                                                                 | 15 | 1,724137931 | 1,328552793 | 0,161415291 |
| REGULATION OF INFLAMMATORY RESPONSE                                               | 15 | 1,724137931 | 3,537205791 | 1,76177E-05 |
| TRANSMEMBRANE RECEPTOR PROTEIN TYROSINE KINASE SIGNALING PATHWAY                  | 15 | 1,724137931 | 2,488123487 | 0,000994521 |
| TRANSCRIPTION BY RNA POLYMERASE II                                                | 15 | 1,724137931 | 1,649477292 | 0,039613513 |
| REGULATION OF BLOOD PRESSURE                                                      | 15 | 1,724137931 | 4,317357046 | 1,31529E-06 |
| SENSORY PERCEPTION OF SOUND                                                       | 15 | 1,724137931 | 2,11224698  | 0,004994271 |
| ANTIGEN PROCESSING AND PRESENTATION OF EXOGENOUS PEPTIDE ANTIGEN VIA MHC CLASS II | 15 | 1,724137931 | 2,965593907 | 0,000145616 |
| TRANSFORMING GROWTH FACTOR BETA RECEPTOR SIGNALING PATHWAY                        | 15 | 1,724137931 | 2,965593907 | 0,000145616 |
| OSTEOBLAST DIFFERENTIATION                                                        | 15 | 1,724137931 | 2,850436392 | 0,00022834  |
| PEPTIDYL-SERINE PHOSPHORYLATION                                                   | 15 | 1,724137931 | 1,758118991 | 0,024290685 |
| HOMOPHILIC CELL ADHESION VIA PLASMA MEMBRANE ADHESION MOLECULES                   | 15 | 1,724137931 | 1,768709431 | 0,023158794 |
| INSULIN RECEPTOR SIGNALING PATHWAY                                                | 14 | 1,609195402 | 3,425341796 | 4,84079E-05 |
| COLLAGEN FIBRIL ORGANIZATION                                                      | 14 | 1,609195402 | 2,768019363 | 0,000496497 |
| POSITIVE REGULATION OF NEURON DIFFERENTIATION                                     | 14 | 1,609195402 | 3,149771257 | 0,000124594 |
| APOPTOTIC SIGNALING PATHWAY                                                       | 14 | 1,609195402 | 4,349493685 | 2,69288E-06 |
| ACTIVATION OF ADENYLATE CYCLASE ACTIVITY                                          | 14 | 1,609195402 | 6,682799247 | 7,26005E-09 |
| RESPONSE TO GLUCOCORTICOID                                                        | 14 | 1,609195402 | 5,372703335 | 1,65068E-07 |
| FEMALE PREGNANCY                                                                  | 14 | 1,609195402 | 3,383058846 | 5,5812E-05  |
| ACTIVATION OF CYSTEINE-TYPE ENDOPEPTIDASE ACTIVITY INVOLVED IN APOPTOTIC PROCESS  | 14 | 1,609195402 | 3,078997833 | 0,000159944 |
| VESICLE-MEDIATED TRANSPORT                                                        | 14 | 1,609195402 | 1,779505208 | 0,026382743 |

|                                                                         |    |             |             |             |
|-------------------------------------------------------------------------|----|-------------|-------------|-------------|
| RHO PROTEIN SIGNAL TRANSDUCTION                                         | 14 | 1,609195402 | 5,169998059 | 2,78998E-07 |
| COMPLEMENT ACTIVATION, CLASSICAL PATHWAY                                | 14 | 1,609195402 | 1,889949639 | 0,016556266 |
| REGULATION OF CYCLIN-DEPENDENT PROTEIN SERINE/THREONINE KINASE ACTIVITY | 13 | 1,494252874 | 4,989212733 | 1,16051E-06 |
| PLATELET ACTIVATION                                                     | 13 | 1,494252874 | 2,378279988 | 0,003158521 |
| REGULATION OF SIGNAL TRANSDUCTION BY P53 CLASS MEDIATOR                 | 13 | 1,494252874 | 1,663288292 | 0,050023679 |
| G1/S TRANSITION OF MITOTIC CELL CYCLE                                   | 13 | 1,494252874 | 3,687867577 | 4,01353E-05 |
| POSITIVE REGULATION OF VASOCONSTRICTION                                 | 13 | 1,494252874 | 8,480497884 | 7,93507E-10 |
| ACTIVATION OF MAPK ACTIVITY                                             | 13 | 1,494252874 | 2,156594708 | 0,007272479 |
| ENDOCYTOSIS                                                             | 13 | 1,494252874 | 1,719476667 | 0,040062449 |
| NOTCH SIGNALING PATHWAY                                                 | 13 | 1,494252874 | 2,494850912 | 0,002059451 |
| LIVER DEVELOPMENT                                                       | 13 | 1,494252874 | 3,438721004 | 8,582E-05   |
| RESPONSE TO NUTRIENT                                                    | 13 | 1,494252874 | 3,975937221 | 1,72808E-05 |
| CELL CYCLE ARREST                                                       | 13 | 1,494252874 | 1,957539739 | 0,015696236 |
| CHOLESTEROL HOMEOSTASIS                                                 | 13 | 1,494252874 | 3,065892561 | 0,000283845 |
| REGULATION OF METABOLIC PROCESS                                         | 13 | 1,494252874 | 4,387170169 | 5,51566E-06 |
| RESPONSE TO CALCIUM ION                                                 | 13 | 1,494252874 | 4,626426859 | 2,92444E-06 |
| INTEGRIN-MEDIATED SIGNALING PATHWAY                                     | 13 | 1,494252874 | 2,736262138 | 0,000870861 |
| EPITHELIAL CELL DIFFERENTIATION                                         | 13 | 1,494252874 | 3,797936748 | 2,89589E-05 |
| PROTEIN LOCALIZATION                                                    | 13 | 1,494252874 | 1,885043637 | 0,020851047 |
| ADHERENS JUNCTION ORGANIZATION                                          | 13 | 1,494252874 | 5,917222541 | 1,30389E-07 |
| RENAL WATER HOMEOSTASIS                                                 | 13 | 1,494252874 | 7,067474077 | 1,14987E-08 |
| RESPONSE TO TOXIC SUBSTANCE                                             | 13 | 1,494252874 | 3,348240251 | 0,000113962 |
| REGULATION OF CELL SHAPE                                                | 13 | 1,494252874 | 1,755049593 | 0,03480767  |
| INTRINSIC APOPTOTIC SIGNALING PATHWAY IN RESPONSE TO DNA DAMAGE         | 12 | 1,379310345 | 5,592427657 | 7,87623E-07 |
| POSITIVE REGULATION OF NEURON PROJECTION DEVELOPMENT                    | 12 | 1,379310345 | 2,042760507 | 0,014557408 |
| NEGATIVE REGULATION OF CELL GROWTH                                      | 12 | 1,379310345 | 1,909908836 | 0,023538696 |

|                                                                                      |    |             |             |             |
|--------------------------------------------------------------------------------------|----|-------------|-------------|-------------|
| ENDOPLASMIC RETICULUM<br>TO GOLGI VESICLE-MEDI-<br>ATED TRANSPORT                    | 12 | 1,379310345 | 1,276766947 | 0,232633773 |
| CELLULAR RESPONSE TO<br>CAMP                                                         | 12 | 1,379310345 | 4,270821412 | 1,69156E-05 |
| NEGATIVE REGULATION OF<br>CELL MIGRATION                                             | 12 | 1,379310345 | 2,02515202  | 0,015508823 |
| ATP BIOSYNTHETIC PRO-<br>CESS                                                        | 12 | 1,379310345 | 8,098513819 | 6,845E-09   |
| CELLULAR RESPONSE TO<br>CALCIUM ION                                                  | 12 | 1,379310345 | 2,830235946 | 0,001005135 |
| WNT SIGNALING PATHWAY                                                                | 12 | 1,379310345 | 1,249603138 | 0,25497756  |
| TRANSMEMBRANE<br>TRANSPORT                                                           | 12 | 1,379310345 | 1,459150897 | 0,122483025 |
| RETINOID METABOLIC PRO-<br>CESS                                                      | 12 | 1,379310345 | 3,728580954 | 7,06141E-05 |
| PROTEIN LOCALIZATION TO<br>PLASMA MEMBRANE                                           | 12 | 1,379310345 | 1,566148163 | 0,083016837 |
| POTASSIUM ION IMPORT<br>ACROSS PLASMA MEM-<br>BRANE                                  | 12 | 1,379310345 | 5,592427657 | 7,87623E-07 |
| T CELL RECEPTOR SIGNAL-<br>ING PATHWAY                                               | 12 | 1,379310345 | 1,319801617 | 0,200681404 |
| RECEPTOR INTERNALIZA-<br>TION                                                        | 12 | 1,379310345 | 5,219681979 | 1,77753E-06 |
| POSITIVE REGULATION OF<br>PATHWAY-RESTRICTED<br>SMAD PROTEIN PHOSPHOR-<br>YLATION    | 12 | 1,379310345 | 4,893519806 | 3,73693E-06 |
| POSITIVE REGULATION OF<br>OSTEOBLAST DIFFERENTIA-<br>TION                            | 12 | 1,379310345 | 3,981323265 | 3,57541E-05 |
| EXTRINSIC APOPTOTIC SIG-<br>NALING PATHWAY IN AB-<br>SENCE OF LIGAND                 | 12 | 1,379310345 | 7,828653312 | 1,08793E-08 |
| COMPLEMENT ACTIVATION                                                                | 12 | 1,379310345 | 2,472770086 | 0,003246964 |
| CELLULAR RESPONSE TO IN-<br>SULIN STIMULUS                                           | 11 | 1,264367816 | 2,220142565 | 0,010548239 |
| ADENYLATE CYCLASE-INHIB-<br>ITING G PROTEIN-COUPLED<br>RECEPTOR SIGNALING<br>PATHWAY | 11 | 1,264367816 | 3,473246739 | 0,00027114  |
| PHOSPHOLIPASE C-ACTI-<br>VATING G PROTEIN-COU-<br>PLED RECEPTOR SIGNALING<br>PATHWAY | 11 | 1,264367816 | 3,530175877 | 0,000233664 |
| POSITIVE REGULATION OF<br>ENDOTHELIAL CELL PROLIF-<br>ERATION                        | 11 | 1,264367816 | 3,076360952 | 0,000795947 |
| NERVOUS SYSTEM PROCESS                                                               | 11 | 1,264367816 | 4,222231529 | 4,24464E-05 |
| DEFENSE RESPONSE TO VI-<br>RUS                                                       | 11 | 1,264367816 | 1,071469232 | 0,452373725 |

|                                                                                           |    |             |             |             |
|-------------------------------------------------------------------------------------------|----|-------------|-------------|-------------|
| MALE GONAD DEVELOPMENT                                                                    | 11 | 1,264367816 | 2,266877489 | 0,009073952 |
| CHOLESTEROL METABOLIC PROCESS                                                             | 11 | 1,264367816 | 2,796728091 | 0,00177738  |
| DEFENSE RESPONSE TO GRAM-POSITIVE BACTERIUM                                               | 11 | 1,264367816 | 2,132224832 | 0,01404055  |
| POSITIVE REGULATION OF NEURON DEATH                                                       | 11 | 1,264367816 | 5,251792984 | 4,49887E-06 |
| CENTRAL NERVOUS SYSTEM DEVELOPMENT                                                        | 11 | 1,264367816 | 1,57197307  | 0,09230113  |
| EPIDERMAL GROWTH FACTOR RECEPTOR SIGNALING PATHWAY                                        | 11 | 1,264367816 | 4,394532346 | 2,85142E-05 |
| GLUCOSE HOMEOSTASIS                                                                       | 11 | 1,264367816 | 2,07072426  | 0,017185419 |
| REGULATION OF CELL POPULATION PROLIFERATION                                               | 11 | 1,264367816 | 1,549356379 | 0,099651553 |
| BLOOD VESSEL REMODELING                                                                   | 11 | 1,264367816 | 6,332726559 | 5,66112E-07 |
| RESPONSE TO VIRUS                                                                         | 11 | 1,264367816 | 1,975745622 | 0,023552892 |
| CELLULAR RESPONSE TO BMP STIMULUS                                                         | 11 | 1,264367816 | 6,52456923  | 4,01415E-07 |
| POSITIVE REGULATION OF BONE MINERALIZATION                                                | 11 | 1,264367816 | 5,666299139 | 1,97274E-06 |
| ANIMAL ORGAN REGENERATION                                                                 | 11 | 1,264367816 | 5,126780059 | 5,81576E-06 |
| NEGATIVE REGULATION OF ANGIOGENESIS                                                       | 11 | 1,264367816 | 2,419683522 | 0,00558807  |
| CELLULAR SODIUM ION HOMEOSTASIS                                                           | 11 | 1,264367816 | 11,32961758 | 3,03508E-10 |
| OSSIFICATION                                                                              | 11 | 1,264367816 | 2,796728091 | 0,00177738  |
| REGULATION OF DEFENSE RESPONSE TO VIRUS BY VIRUS                                          | 11 | 1,264367816 | 7,9739367   | 3,58792E-08 |
| WOUND HEALING                                                                             | 11 | 1,264367816 | 2,340789374 | 0,007166911 |
| CEREBRAL CORTEX DEVELOPMENT                                                               | 11 | 1,264367816 | 3,364724735 | 0,000361426 |
| SODIUM ION EXPORT ACROSS PLASMA MEMBRANE                                                  | 11 | 1,264367816 | 15,37302143 | 1,85197E-12 |
| CELLULAR RESPONSE TO AMINO ACID STARVATION                                                | 11 | 1,264367816 | 2,691863895 | 0,002426495 |
| TRANSFERRIN TRANSPORT                                                                     | 11 | 1,264367816 | 5,981006117 | 1,08207E-06 |
| NEGATIVE REGULATION OF CYSTEINE-TYPE ENDOPEPTIDASE ACTIVITY INVOLVED IN APOPTOTIC PROCESS | 10 | 1,149425287 | 3,625517028 | 0,000356421 |
| CELLULAR RESPONSE TO GROWTH FACTOR STIMULUS                                               | 10 | 1,149425287 | 3,559610519 | 0,000415967 |
| MITOTIC CELL CYCLE                                                                        | 10 | 1,149425287 | 1,472176338 | 0,143301407 |

|                                                           |    |             |             |             |
|-----------------------------------------------------------|----|-------------|-------------|-------------|
| REGULATION OF ACTIN CYTOSKELETON ORGANIZATION             | 10 | 1,149425287 | 2,682018555 | 0,003865025 |
| CELLULAR RESPONSE TO AMYLOID-BETA                         | 10 | 1,149425287 | 5,593092678 | 6,60253E-06 |
| NEURON APOPTOTIC PROCESS                                  | 10 | 1,149425287 | 4,894130834 | 2,41558E-05 |
| POSITIVE REGULATION OF NEURON APOPTOTIC PROCESS           | 10 | 1,149425287 | 3,99539226  | 0,000154236 |
| POSITIVE REGULATION OF PROTEIN SECRETION                  | 10 | 1,149425287 | 4,165372786 | 0,000106619 |
| TRANSPORT ACROSS BLOOD-BRAIN BARRIER                      | 10 | 1,149425287 | 2,330843646 | 0,010406573 |
| FATTY ACID METABOLIC PROCESS                              | 10 | 1,149425287 | 2,645779958 | 0,004269344 |
| REGULATION OF MACROAUTOPHAGY                              | 10 | 1,149425287 | 2,719263639 | 0,003491602 |
| CELLULAR RESPONSE TO HYDROGEN PEROXIDE                    | 10 | 1,149425287 | 3,15778382  | 0,001107531 |
| LIPID TRANSPORT                                           | 10 | 1,149425287 | 2,837475361 | 0,002540058 |
| REGULATION OF INSULIN SECRETION                           | 10 | 1,149425287 | 2,879196804 | 0,002273778 |
| RESPONSE TO ORGANIC CYCLIC COMPOUND                       | 10 | 1,149425287 | 4,449310944 | 5,87174E-05 |
| ANIMAL ORGAN MORPHOGENESIS                                | 10 | 1,149425287 | 1,450367933 | 0,153289365 |
| KIDNEY DEVELOPMENT                                        | 10 | 1,149425287 | 1,864719309 | 0,042211213 |
| T CELL ACTIVATION                                         | 10 | 1,149425287 | 4,552759234 | 4,75286E-05 |
| ODONTOGENESIS OF DENTIN-CONTAINING TOOTH                  | 10 | 1,149425287 | 3,764933179 | 0,000258436 |
| CRISTAE FORMATION                                         | 10 | 1,149425287 | 6,314549328 | 1,92234E-06 |
| CELL-CELL ADHESION VIA PLASMA-MEMBRANE ADHESION MOLECULES | 10 | 1,149425287 | 5,290845033 | 1,14134E-05 |
| CELLULAR RESPONSE TO TUMOR NECROSIS FACTOR                | 10 | 1,149425287 | 1,553957421 | 0,111146395 |
| CALCIUM ION TRANSMEMBRANE TRANSPORT                       | 10 | 1,149425287 | 3,15778382  | 0,001107531 |
| CELLULAR POTASSIUM ION HOMEOSTASIS                        | 10 | 1,149425287 | 15,05105109 | 2,88095E-11 |
| ATP METABOLIC PROCESS                                     | 10 | 1,149425287 | 6,524964167 | 1,36447E-06 |
| MITOCHONDRIAL ATP SYNTHESIS COUPLED PROTON TRANSPORT      | 10 | 1,149425287 | 10,30058783 | 7,02052E-09 |
| CARTILAGE DEVELOPMENT                                     | 10 | 1,149425287 | 3,375524473 | 0,000646181 |
| REGULATION OF HEART RATE BY CARDIAC CONDUCTION            | 9  | 1,034482759 | 4,518131737 | 0,000121065 |

|                                                                           |   |             |             |             |
|---------------------------------------------------------------------------|---|-------------|-------------|-------------|
| POSITIVE REGULATION OF DNA-BINDING TRANSCRIPTION FACTOR ACTIVITY          | 9 | 1,034482759 | 1,573540925 | 0,119408007 |
| ACTIVATION OF PHOSPHOLIPASE C ACTIVITY                                    | 9 | 1,034482759 | 5,506164294 | 2,21167E-05 |
| CIRCADIAN RHYTHM                                                          | 9 | 1,034482759 | 2,554011289 | 0,008262604 |
| POSITIVE REGULATION OF SMOOTH MUSCLE CELL PROLIFERATION                   | 9 | 1,034482759 | 3,263327514 | 0,00152972  |
| AMYLOID FIBRIL FORMATION                                                  | 9 | 1,034482759 | 2,753512249 | 0,005032156 |
| ANTIBACTERIAL HUMORAL RESPONSE                                            | 9 | 1,034482759 | 3,388815979 | 0,001159261 |
| ANTIMICROBIAL HUMORAL IMMUNE RESPONSE MEDIATED BY ANTIMICROBIAL PEPTIDE   | 9 | 1,034482759 | 1,711021445 | 0,080732699 |
| DEFENSE RESPONSE TO GRAM-NEGATIVE BACTERIUM                               | 9 | 1,034482759 | 2,04920729  | 0,031320746 |
| NEGATIVE REGULATION OF CANONICAL WNT SIGNALING PATHWAY                    | 9 | 1,034482759 | 0,995719559 | 0,554988993 |
| POSITIVE REGULATION OF PROTEIN BINDING                                    | 9 | 1,034482759 | 2,554011289 | 0,008262604 |
| POST-GOLGI VESICLE-MEDIATED TRANSPORT                                     | 9 | 1,034482759 | 3,038309241 | 0,002553752 |
| PHAGOCYTOSIS                                                              | 9 | 1,034482759 | 2,937049143 | 0,003237601 |
| ADENYLATE CYCLASE-MODULATING G PROTEIN-COUPLED RECEPTOR SIGNALING PATHWAY | 9 | 1,034482759 | 3,388815979 | 0,001159261 |
| SYNAPTIC TRANSMISSION, CHOLINERGIC                                        | 9 | 1,034482759 | 9,271558078 | 1,32935E-07 |
| POSITIVE REGULATION OF ENDOTHELIAL CELL MIGRATION                         | 9 | 1,034482759 | 2,842320901 | 0,004057894 |
| CELLULAR RESPONSE TO OXIDATIVE STRESS                                     | 9 | 1,034482759 | 1,798309551 | 0,063041341 |
| INTRACELLULAR RECEPTOR SIGNALING PATHWAY                                  | 9 | 1,034482759 | 3,388815979 | 0,001159261 |
| FATTY ACID BETA-OXIDATION                                                 | 9 | 1,034482759 | 3,915848013 | 0,000384462 |
| PEPTIDYL-TYROSINE PHOSPHORYLATION                                         | 9 | 1,034482759 | 3,146800912 | 0,001989684 |
| CYTOSKELETON ORGANIZATION                                                 | 9 | 1,034482759 | 1,587715693 | 0,11468314  |
| B CELL RECEPTOR SIGNALING PATHWAY                                         | 9 | 1,034482759 | 1,573540925 | 0,119408007 |
| PROTEIN HOMOTETRAMERIZATION                                               | 9 | 1,034482759 | 3,146800912 | 0,001989684 |

|                                                                                  |   |             |             |             |
|----------------------------------------------------------------------------------|---|-------------|-------------|-------------|
| SMAD PROTEIN SIGNAL TRANSDUCTION                                                 | 9 | 1,034482759 | 3,038309241 | 0,002553752 |
| POSITIVE REGULATION OF B CELL PROLIFERATION                                      | 9 | 1,034482759 | 4,297788809 | 0,000182585 |
| MUSCLE CONTRACTION                                                               | 9 | 1,034482759 | 1,694570898 | 0,084597462 |
| GENERATION OF PRECURSOR METABOLITES AND ENERGY                                   | 9 | 1,034482759 | 3,749251628 | 0,000539483 |
| ETHANOL OXIDATION                                                                | 9 | 1,034482759 | 14,6754637  | 4,38387E-10 |
| NEURON DIFFERENTIATION                                                           | 9 | 1,034482759 | 1,198913809 | 0,337894538 |
| TUMOR NECROSIS FACTOR-MEDIATED SIGNALING PATHWAY                                 | 9 | 1,034482759 | 1,468646938 | 0,1608601   |
| PEPTIDYL-THREONINE PHOSPHORYLATION                                               | 9 | 1,034482759 | 2,630239055 | 0,006822337 |
| NEGATIVE REGULATION OF CELL ADHESION                                             | 9 | 1,034482759 | 4,097938132 | 0,000268134 |
| CELL-MATRIX ADHESION                                                             | 9 | 1,034482759 | 1,894982465 | 0,048034401 |
| CELL MORPHOGENESIS                                                               | 9 | 1,034482759 | 2,349717625 | 0,013981632 |
| MULTICELLULAR ORGANISM GROWTH                                                    | 9 | 1,034482759 | 2,414084633 | 0,011822736 |
| HEMOPOIESIS                                                                      | 9 | 1,034482759 | 3,388815979 | 0,001159261 |
| REGULATION OF TRANSCRIPTION INITIATION FROM RNA POLYMERASE II PROMOTER           | 9 | 1,034482759 | 3,263327514 | 0,00152972  |
| POSITIVE REGULATION OF CANONICAL WNT SIGNALING PATHWAY                           | 9 | 1,034482759 | 1,198913809 | 0,337894538 |
| CALCIUM-DEPENDENT CELL-CELL ADHESION VIA PLASMA MEMBRANE CELL ADHESION MOLECULES | 9 | 1,034482759 | 4,195484862 | 0,000221961 |
| T CELL COSTIMULATION                                                             | 9 | 1,034482759 | 3,455250325 | 0,001003349 |
| TRANSCRIPTION INITIATION FROM RNA POLYMERASE II PROMOTER                         | 9 | 1,034482759 | 1,258855218 | 0,288038364 |
| POSITIVE REGULATION OF FIBROBLAST PROLIFERATION                                  | 9 | 1,034482759 | 4,004824337 | 0,000321984 |
| WNT SIGNALING PATHWAY, PLANAR CELL POLARITY PATHWAY                              | 9 | 1,034482759 | 2,025655891 | 0,033416058 |
| RESPONSE TO ESTROGEN                                                             | 9 | 1,034482759 | 2,986821201 | 0,002879684 |
| WATER TRANSPORT                                                                  | 9 | 1,034482759 | 11,00888938 | 1,89246E-08 |
| CELLULAR RESPONSE TO UV                                                          | 9 | 1,034482759 | 3,324888116 | 0,00133417  |
| POSITIVE REGULATION OF EPITHELIAL CELL PROLIFERATION                             | 9 | 1,034482759 | 3,091603562 | 0,002257749 |
| COMPLEMENT ACTIVATION, ALTERNATIVE PATHWAY                                       | 9 | 1,034482759 | 11,74232639 | 8,67359E-09 |
